# Supplementary material for: Polypyrrole modified magnetic reduced graphene oxide composites: synthesis, characterization and application for selective lead adsorption
Source: Royal Society of Chemistry journal article supplement (doi:10.1039/d0ra01546f), 2020-01-01
Supplement: d0ra01546f1.pdf [file d0ra01546f1.pdf]

## Supplementary Information

### **Polypyrrole modified magnetic reduced graphene oxide nanocomposites: Synthesis, characterization and its application for highly selective lead adsorption**

Zhanmeng Liu <sup>a, b, \*</sup>, Zhimin Gao <sup>a</sup>, Lichun Xu <sup>a</sup>, and Fengping  
Hu <sup>a</sup>

<sup>a</sup> School of Civil Engineering and Architecture, East China Jiao  
Tong University, Nanchang, 330013, P.R. China

<sup>b</sup> School of Civil Engineering and Architecture, Nanchang  
Institute of Technology, Nanchang 330099, China

\* Corresponding author

Corresponding author E-mail: [ustblzm@sina.com](mailto:ustblzm@sina.com)

Tel: 86-791-87046054 Fax:86-791-87046027

## Chart and Chart description

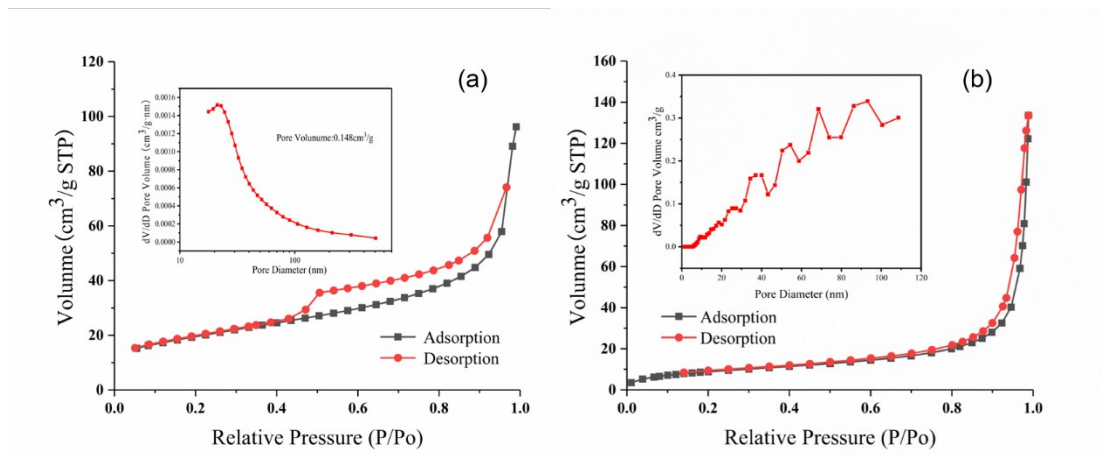

Fig. S1 N<sub>2</sub> adsorption-desorption isotherms of Fe<sub>3</sub>O<sub>4</sub>/rGO (a) and PPy-FG (b); the corresponding BJH adsorption pore distributions curve (inset).

Tab. S1 Description of the kinetic models

| Kinetic models      | Equations                                 | Parameters description                                                                                                                                                          |
|---------------------|-------------------------------------------|---------------------------------------------------------------------------------------------------------------------------------------------------------------------------------|
| Pseudo-first-order  | $q_t = q_e(1 - e^{-K_1 t})$               | $q_t$ is the adsorption capacity of the adsorbent at time t, t (min) is the contact time, $q_e$ is the adsorption capacity at equilibrium, $K_1$ (min <sup>-1</sup> ) and $K_2$ |
| Pseudo-second-order | $q_t = \frac{q_e^2 K_2 t}{1 + q_e K_2 t}$ | (g/mg · min) are the rate constants                                                                                                                                             |

Tab. S2 Description of the equilibrium isotherm equations

| Type       | Equations                               | Parameters description                                                                                                                                                                               |
|------------|-----------------------------------------|------------------------------------------------------------------------------------------------------------------------------------------------------------------------------------------------------|
| Langmuir   | $q_e = \frac{q_m K_L C_e}{1 + K_L C_e}$ | $q_e$ (mg/g) is the equilibrium adsorption capacity, $C_e$ (mg/L) is equilibrium concentration, $q_m$ (mg/g) is the maximum adsorption capacity and $K_L$ (L/mg) is the Langmuir adsorption constant |
| Freundlich | $q_e = K_F C_e^{1/n}$                   | $K_F$ (mg/g) is Freundlich affinity coefficient and n is Freundlich constant                                                                                                                         |

Tab. S3 Description of the adsorption thermodynamics equations

| Type              | Equations                                                        | Parameters description                                                                                                                                                                                                                                                                                                                                                                                                                                                                                                                                                                        |
|-------------------|------------------------------------------------------------------|-----------------------------------------------------------------------------------------------------------------------------------------------------------------------------------------------------------------------------------------------------------------------------------------------------------------------------------------------------------------------------------------------------------------------------------------------------------------------------------------------------------------------------------------------------------------------------------------------|
| Van't Hoff        | $\ln K = \frac{\Delta S^\theta}{R} - \frac{\Delta H^\theta}{RT}$ | $\Delta G^\theta$ (kJ/mol) denotes the change in Gibb's energy, R is the ideal gas constant (8.314J/mol/K), T (K) is the absolute temperature, K (L/g) is thermodynamic equilibrium constant. $q_e$ (mg/g) and $C_e$ (mg/L) are the equilibrium adsorption capacity and equilibrium concentration at temperature T, respectively. $\Delta H^\theta$ (kJ/mol) and $\Delta S^\theta$ (kJ/mol/K) are the changes in enthalpy and entropy, respectively. The $\Delta H^\theta$ and $\Delta S^\theta$ values are calculated from the slope and intercept of the linear plot of $\ln K$ versus 1/T. |
| Gibbs free energy | $\Delta G^\theta = \Delta H^\theta - T\Delta S^\theta$           |                                                                                                                                                                                                                                                                                                                                                                                                                                                                                                                                                                                               |
